# Supplementary material for: Molecular insights into biogenesis of glycosylphosphatidylinositol anchor proteins
Source: Research Square preprint supplement (doi:10.21203/rs.3.rs-1339620/v1), 2022-03-01
Supplement: Supplementary file 2 [file 394131058521509345a0ca88.xlsx]

## Sheet: Fig.2d_PIGK-active-site 
		GFP fluorescence (% of the total cells)		CD59 fluorescence (% of the GFP-positive cells)		Activity (CD59 fluorescence, % of the WT)		GFP fluorescence (% of the total cells)		CD59 fluorescence (% of the GFP-positive cells)		Activity (CD59 fluorescence, % of the WT)		GFP fluorescence (% of the total cells)		CD59 fluorescence (% of the GFP-positive cells)		Activity (CD59 fluorescence, % of the WT)		Average	SEM
		WT	mutant	WT	mutant			WT	mutant	WT	mutant			WT	mutant	WT	mutant
Catalytic dyad	H164A	4.53	3.55	97.7	0	0		7.48	1.55	97.8	0	0		28.8	17	94.7	0	0		0	0
	C206S	4.53	4.71	97.7	0	0		7.48	5.54	97.8	0	0		28.8	20.2	94.7	0	0		0	0
S1 site	R60A	4.53	7.83	97.7	75.9	77.6868		7.48	8.9	97.8	83.7	85.5828		12.6	11.6	95.9	64.5	67.2576		76.8424	5.30687
	R60E	4.53	8.65	97.7	11	11.259		7.48	5.87	97.8	8.15	8.33333		3.58	11.4	94.9	9.34	9.84194		9.81141	0.844692
	R60K	4.53	3.16	97.7	34.1	34.9028		7.48	3.31	97.8	37.7	38.5481		3.58	6.44	94.9	49.1	51.7387		41.7298	5.11386
	R60L	4.53	5.89	97.7	56.8	58.1372		7.48	13.4	97.8	54.8	56.0327		3.58	10.1	94.9	57.6	60.6955		58.2884	1.34814
	H61A	4.53	3.21	97.7	96	98.26		7.48	2.34	97.8	95.5	97.6483		3.58	9.18	94.9	94.6	99.6839		98.5307	0.603021
	H61D	4.53	8.98	97.7	97.2	99.4882		7.48	6.97	97.8	97.4	99.591		3.6	20	94.9	92.1	97.0495		98.7096	0.83056
	D204A	4.53	3.1	97.7	83.2	85.1586		4.88	6.91	97.7	89.1	91.1975		3.6	10.4	94.9	80.5	84.8261		87.0608	2.07061
	D204E	12.9	6.79	97.8	96.6	98.773		5.4	6.22	98.3	98.2	99.8983		4.1	8.07	98.2	98.3	100.102		99.591	0.413215
	D204N	4.5	4.6	97.7	94.6	96.827		4.88	6.67	97.7	94.7	96.9294		3.6	8.94	94.9	84.2	88.725		94.1605	2.7179
	D204K	14.3	3.88	97.7	43.8	44.8311		4.88	1.53	97.7	37.4	38.2805		4.5	6.64	97.7	28	28.6592		37.2569	4.69641
	D247A	4.5	2.39	97.7	86.1	88.1269		4.88	1.38	97.7	54.3	55.5783		3.6	6.6	94.9	69.9	73.6565		72.4539	9.4152
	D247E	4.53	10.5	97.7	90.4	92.5281		4.88	7.75	97.7	86.9	88.9458		3.6	13.5	94.9	82.4	86.8282		89.434	1.66344
	D247N	4.53	4.55	97.7	96	98.26		4.88	4.07	97.7	96.7	98.9765		3.6	16.9	94.9	92.3	97.2603		98.1656	0.497664
	D247K	4.53	3.55	97.7	4.08	4.17605		4.88	4.7	97.7	3.2	3.27533		3.6	9.27	94.9	2.12	2.23393		3.22844	0.561131
S1' site	G165A	4.5	2.31	97.7	72.1	73.7973		3.6	2.95	94.9	46	48.4721		4.5	2.87	97.7	69.7	71.3408		64.5368	8.06358
	G166A	12.9	4.48	97.7	95.1	97.3388		4.1	5.9	98.2	98.2	100		5.4	4.86	98.3	97.5	99.1862		98.8417	0.7873
	Q207A	14.3	19.8	97.7	97.4	99.6929		7.5	5.38	97.8	94.8	96.9325		14.3	15.9	97.7	97.5	99.7953		98.8069	0.937665
	Q207E	4.53	6.68	97.7	85.9	87.9222		7.48	3.81	97.8	79.4	81.1861		3.6	1.91	94.9	70.7	74.4995		81.2026	3.87482
	Q207K	4.5	4.27	97.7	80.1	81.9857		7.5	2.57	97.8	65.4	66.8712		3.6	2.9	94.9	61.3	64.5943		71.1504	5.45737
S2' site	F169A	14.3	20.4	97.7	96.3	98.567		4.88	18.8	97.7	95.5	97.7482		7.5	4.39	97.8	92.2	94.274		96.8631	1.31594
	E177A	4.53	5.67	97.7	96.6	98.8741		7.48	7.42	97.8	97.9	100.102		4.53	4.98	97.7	95.3	97.5435		98.84	0.738845
	T179A	4.5	2.87	97.7	80.9	82.8045		7.5	1.99	97.8	59.2	60.5317		3.6	2.94	94.9	54	56.902		66.7461	8.0973

## Sheet: Fig.3d-S8b_GPI-site 
		GFP fluorescence (% of the total cells)		CD59 fluorescence (% of the GFP-positive cells)		Activity (CD59 fluorescence, % of the WT)		GFP fluorescence (% of the total cells)		CD59 fluorescence (% of the GFP-positive cells)		Activity (CD59 fluorescence, % of the WT)		GFP fluorescence (% of the total cells)		CD59 fluorescence (% of the GFP-positive cells)		Activity (CD59 fluorescence, % of the WT)		Average	SEM
		WT	mutant	WT	mutant			WT	mutant	WT	mutant			WT	mutant	WT	mutant
Data for Fig. 4d
PIGT
Strong H-bonding	D521A	40.6	26.9	98.3	26.3	26.7548		11.2	9.01	97.9	18.2	18.5904		10.9	7.35	97.9	40.4	41.2666		28.8706	6.63099
	D521L	40.6	33.8	98.3	12.8	13.0214		11.2	14.9	97.9	12	12.2574		10.9	15	97.9	30.6	31.2564		18.8451	6.20958
	D521Y	11.5	5.69	97.8	88.6	90.593		20.9	24.5	81.9	59.8	73.0159		33.3	34.4	75	50.4	67.2		76.9363	7.03174
Strong H-bonding	S523A	11.2	9.04	97.9	96	98.0592		10.9	10.4	97.9	97.2	99.285		40.6	32.5	98.3	96.2	97.8637		98.4026	0.444771
	S523F	11.2	15.7	97.9	68.1	69.5608		10.9	12.5	97.9	83.3	85.0868		40.6	34.6	98.3	73.6	74.8728		76.5068	4.55584
	S523W	8.62	14.2	95.9	75.2	78.415		10.9	13.3	97.9	78.4	80.0817		8.62	9.17	95.9	69	71.9499		76.8156	2.47993
Double mutant	D521L/S523F	20.4	29.6	99	6.85	6.91919		20.3	19.4	99	6.87	6.93939		15.1	18.1	96.9	4.56	4.70588		6.18816	0.74116
GPAA1
Weak H-bonding	H354A	25.6	22.3	99.8	97.8	97.996		25.4	29.2	99.4	99	99.5976		28.6	41.7	99.6	99.2	99.5984		99.064	0.533999
	H354E	14.9	9.56	98.8	91.9	93.0162		6.8	14.2	98.9	98.8	99.8989		40.1	41.2	99.2	93.7	94.4556		95.7902	2.09593
	H354F	5.06	21.4	99	69.2	69.899		14.9	11.8	98.8	71.2	72.0648		40.1	44.2	99.2	80.9	81.5524		74.5054	3.57855
PIGU
In the vicinity of GPI	N385A	9.77	12.5	99.8	93.9	94.0882		8.54	15	96.8	93.5	96.5909		8.62	15	97.5	95	97.4359		96.0383	1.00512
	N385D	9.77	11.8	99.8	97.8	97.996		8.54	13.1	96.8	98.4	101.653		8.62	9.48	97.5	97.6	100.103		99.9171	1.05972
	N385L	9.77	14.8	99.8	97.6	97.7956		8.54	14	96.8	98.1	101.343		8.62	13.5	97.5	96.8	99.2821		99.4735	1.02851
Data for Fig. S8
PIGT
Conserved Patch	Y456A	7.8	7.27	98.2	98	99.7963		8.54	11.5	96.8	95.7	98.8636		8.62	10.9	97.5	96.6	99.0769		99.2456	0.282151
Conserved Patch	P460A	7.8	7.82	98.2	98.4	100.204		8.54	14.8	96.8	97.1	100.31		8.62	16.1	97.5	96.3	98.7692		99.7609	0.496801
	P460L	7.8	7.16	98.2	96.6	98.3707		8.54	18.3	96.8	93	96.0744		8.62	16.5	97.5	94.4	96.8205		97.0885	0.676292
In the vicinity of GPI	N461A	8.62	11.7	95.9	92.6	96.5589		8.54	7.65	96.8	93.6	96.6942		8.62	7.83	97.5	94.8	97.2308		96.828	0.205154
	N461D	8.62	9.1	95.9	95.9	100		8.54	7.28	96.8	94.8	97.9339		8.62	7.75	97.5	95.1	97.5385		98.4908	0.763194
	N461Q	8.62	12.3	95.9	97	101.147		8.54	8.85	96.8	96.5	99.6901		8.62	9.81	97.5	97.4	99.8974		100.245	0.455044
	N461L	8.62	7.54	95.9	92.9	96.8717		8.54	7.9	96.8	94.5	97.624		8.62	8.15	97.5	93.5	95.8974		96.7977	0.499779
Conserved Patch	F522A	7.8	11.4	98.2	97.6	99.389		8.54	19	96.8	95.5	98.657		8.62	17.4	97.5	94.3	96.7179		98.2547	0.79688
Hydrophobic interaction	M524A	7.8	4.81	98.2	92.9	94.6029		8.54	16.6	96.8	92	95.0413		8.62	16.2	97.5	92.4	94.7692		94.8045	0.127796
	M524L	7.8	8	98.2	97.7	99.4908		8.54	16.1	96.8	97.1	100.31		8.62	13.3	97.5	96.8	99.2821		99.6943	0.31367
Conserved Patch	N527A	7.8	6.41	98.2	98.9	100.713		8.54	16.9	96.8	97.8	101.033		8.62	8.04	97.5	97.8	100.308		100.685	0.209873
GPAA1
Weak H-bonding	Q355A	16.9	14.6	99.2	98.9	99.6976		25.6	12.5	99.8	99.1	99.2986		25.4	15.4	99.4	98.5	99.0946		99.3636	0.177081
	Q355F	16.9	32.9	99.2	98.2	98.9919		25.6	10	99.8	97.7	97.8958		25.4	12.6	99.4	98	98.5915		98.4931	0.320236
PIGU
Weak H-bonding	N383A	18.6	22.8	99.7	99.5	99.7994		13.9	37.2	99.7	99.3	99.5988		29.1	38.1	99.7	99.2	99.4985		99.6322	0.0884571
	N383D	18.6	15.5	99.7	98.5	98.7964		13.9	23.2	99.7	98.4	98.6961		29.1	26.3	99.7	98	98.2949		98.5958	0.153212
	N383F	18.6	26.2	99.7	99.6	99.8997		13.9	26.8	99.7	99.5	99.7994		29.1	42.2	99.7	99.2	99.4985		99.7325	0.120547
PIGK
Conserved Patch	F55A	12.9	5.99	97.8	97.7	99.8978		4.88	7.47	97.7	98.8	101.126		5.4	11	98.3	99.1	100.814		100.612	0.368551
Conserved Patch	D174A	12.9	9.09	97.8	96.8	98.9775		4.88	7.87	97.7	97.7	100		5.4	8.45	98.3	98.8	100.509		99.8287	0.450223

## Sheet: Fig. S7d_GPAA1
	GFP fluorescence (% of the total cells)		CD59 fluorescence (% of the GFP-positive cells)		Activity (CD59 fluorescence, % of the WT)		GFP fluorescence (% of the total cells)		CD59 fluorescence (% of the GFP-positive cells)		Activity (CD59 fluorescence, % of the WT)		GFP fluorescence (% of the total cells)		CD59 fluorescence (% of the GFP-positive cells)		Activity (CD59 fluorescence, % of the WT)		Average	SEM
	WT	mutant	WT	mutant			WT	mutant	WT	mutant			WT	mutant	WT	mutant
GPAA1
D153A	14.9	9.65	98.8	99.3	100.506		6.81	2.36	98.9	99.1	100.202		43.9	8.32	98.7	96.7	97.9737		99.5607	0.79833
E186A	14.9	13.7	98.8	99	100.202		6.81	6.83	98.9	99.2	100.303		43.9	14	98.7	97.8	99.0881		99.8646	0.389337
H187A	14.9	7.6	98.8	98.4	99.5951		6.81	6.11	98.9	99.4	100.506		43.9	31.3	98.7	97.2	98.4802		99.527	0.585651
D188A	14.9	9.07	98.8	99.3	100.506		6.81	5.87	98.9	99.4	100.506		43.9	9.69	98.7	96.6	97.8723		99.628	0.877826
E226A	14.9	15	98.8	98.6	99.7976		6.81	7.03	98.9	99.7	100.809		43.9	19.5	98.7	96.5	97.771		99.4592	0.893133
H303A	14.9	13.5	98.8	98.9	100.101		6.81	10.1	98.9	98.8	99.8989		43.9	14.3	98.7	96.8	98.075		99.3584	0.644345

## Sheet: F274 W275
	GFP fluorescence (% of the total cells)		CD59 fluorescence (% of the GFP-positive cells)		Activity (CD59 fluorescence, % of the WT)		GFP fluorescence (% of the total cells)		CD59 fluorescence (% of the GFP-positive cells)		Activity (CD59 fluorescence, % of the WT)		GFP fluorescence (% of the total cells)		CD59 fluorescence (% of the GFP-positive cells)		Activity (CD59 fluorescence, % of the WT)		Average	SEM
	WT	mutant	WT	mutant			WT	mutant	WT	mutant			WT	mutant	WT	mutant
F274L,W275L	26.8	15.4	99.6	0.09	0.0903614		30.4	16	99.4	0.32	0.321932		12.2	5.92	97	0.089	0.0917526		0.168015	0.0769592
F274L	26.8	27.8	99.6	99.8	100.201		30.4	35.4	99.4	99.6	100.201		25.2	27.4	99.8	99.5	99.6994		100.034	0.167202
W275L	26.8	32.7	99.6	16	16.0643		30.4	31.2	99.4	25.1	25.2515		25.2	29.4	99.8	11.9	11.9238		17.7465	3.93824
